# Supplementary material for: Bridging Cancer Biology with the Clinic: Relative Expression of a GRHL2-Mediated Gene-Set Pair Predicts Breast Cancer Metastasis
Source: PubMed Central journal article supplement (PMC3575392; doi:10.1371/journal.pone.0056195), 2013-02-18
Supplement: pone.0056195.s008.pdf [file pone.0056195.s008.pdf]

**Bridging Cancer Biology to with the Clinic: Relative Expression of a GRHL2-mediated Gene-set Pair  
Predicts Breast Cancer Metastasis**

Xinan “Holly” Yang, Prabhakaran Vasudevan, Vishwas Parekh, Aleks Penev, John M. Cunningham  
Departments of Pediatrics, Section of Hematology/Oncology, and Comer Children’s Hospital, The University of  
Chicago

**Data S2: Prognostic indexes (Is), the relative expression of the identified GSP, of 388 independent  
validation patients in the pooled three-dataset.**

| <b>GEO sample ID</b> | <b>GSE Access ID</b> | <b>DMFS (year)</b> | <b>DMFS.event</b> | <b>Is&gt;0</b> |
|----------------------|----------------------|--------------------|-------------------|----------------|
| GSM308256            | GSE12276             | 0.25               | 1                 | TRUE           |
| GSM308257            | GSE12276             | 2.08               | 1                 | TRUE           |
| GSM308258            | GSE12276             | 1.92               | 1                 | TRUE           |
| GSM308259            | GSE12276             | 1.08               | 1                 | TRUE           |
| GSM308260            | GSE12276             | 1.67               | 1                 | TRUE           |
| GSM308261            | GSE12276             | 1.50               | 1                 | TRUE           |
| GSM308262            | GSE12276             | 2.50               | 1                 | TRUE           |
| GSM308263            | GSE12276             | 5.75               | 1                 | TRUE           |
| GSM308264            | GSE12276             | 3.08               | 0                 | TRUE           |
| GSM308265            | GSE12276             | 1.92               | 1                 | TRUE           |
| GSM308266            | GSE12276             | 0.25               | 1                 | TRUE           |
| GSM308267            | GSE12276             | 1.42               | 1                 | TRUE           |
| GSM308268            | GSE12276             | 3.17               | 1                 | TRUE           |
| GSM308269            | GSE12276             | 0.67               | 1                 | TRUE           |
| GSM308270            | GSE12276             | 0.58               | 1                 | TRUE           |
| GSM308271            | GSE12276             | 2.42               | 0                 | TRUE           |
| GSM308272            | GSE12276             | 1.17               | 1                 | TRUE           |
| GSM308273            | GSE12276             | 1.58               | 1                 | TRUE           |
| GSM308274            | GSE12276             | 2.42               | 0                 | TRUE           |
| GSM308275            | GSE12276             | 0.58               | 1                 | TRUE           |
| GSM308276            | GSE12276             | 1.33               | 1                 | TRUE           |
| GSM308277            | GSE12276             | 1.83               | 1                 | TRUE           |
| GSM308278            | GSE12276             | 1.67               | 1                 | TRUE           |
| GSM308279            | GSE12276             | 1.67               | 1                 | TRUE           |
| GSM308280            | GSE12276             | 1.33               | 1                 | TRUE           |
| GSM308281            | GSE12276             | 0.42               | 1                 | TRUE           |
| GSM308282            | GSE12276             | 0.83               | 1                 | TRUE           |
| GSM308283            | GSE12276             | 1.08               | 1                 | TRUE           |
| GSM308284            | GSE12276             | 3.83               | 1                 | TRUE           |
| GSM308285            | GSE12276             | 0.58               | 1                 | TRUE           |
| GSM308286            | GSE12276             | 0.92               | 1                 | TRUE           |
| GSM308287            | GSE12276             | 3.50               | 1                 | TRUE           |
| GSM308288            | GSE12276             | 0.83               | 1                 | TRUE           |
| GSM308289            | GSE12276             | 5.08               | 1                 | TRUE           |
| GSM308290            | GSE12276             | 0.50               | 1                 | TRUE           |
| GSM308291            | GSE12276             | 2.08               | 1                 | TRUE           |
| GSM308292            | GSE12276             | 8.25               | 1                 | TRUE           |

|           |          |      |   |      |
|-----------|----------|------|---|------|
| GSM308293 | GSE12276 | 0.42 | 1 | TRUE |
| GSM308294 | GSE12276 | 1.75 | 1 | TRUE |
| GSM308295 | GSE12276 | 0.92 | 1 | TRUE |
| GSM308296 | GSE12276 | 2.67 | 0 | TRUE |
| GSM308297 | GSE12276 | 1.17 | 1 | TRUE |
| GSM308298 | GSE12276 | 1.17 | 1 | TRUE |
| GSM308299 | GSE12276 | 1.50 | 1 | TRUE |
| GSM308300 | GSE12276 | 2.42 | 1 | TRUE |
| GSM308301 | GSE12276 | 1.25 | 0 | TRUE |
| GSM308302 | GSE12276 | 2.00 | 1 | TRUE |
| GSM308303 | GSE12276 | 3.25 | 1 | TRUE |
| GSM308304 | GSE12276 | 4.50 | 1 | TRUE |
| GSM308305 | GSE12276 | 1.25 | 1 | TRUE |
| GSM308306 | GSE12276 | 2.33 | 1 | TRUE |
| GSM308307 | GSE12276 | 2.42 | 1 | TRUE |
| GSM308308 | GSE12276 | 1.92 | 1 | TRUE |
| GSM308309 | GSE12276 | 1.67 | 1 | TRUE |
| GSM308310 | GSE12276 | 3.00 | 0 | TRUE |
| GSM308311 | GSE12276 | 3.00 | 1 | TRUE |
| GSM308312 | GSE12276 | 9.58 | 0 | TRUE |
| GSM308313 | GSE12276 | 0.33 | 1 | TRUE |
| GSM308314 | GSE12276 | 0.67 | 1 | TRUE |
| GSM308315 | GSE12276 | 5.00 | 1 | TRUE |
| GSM308316 | GSE12276 | 0.00 | 1 | TRUE |
| GSM308318 | GSE12276 | 3.50 | 1 | TRUE |
| GSM308319 | GSE12276 | 1.25 | 1 | TRUE |
| GSM308320 | GSE12276 | 0.58 | 1 | TRUE |
| GSM308321 | GSE12276 | 0.00 | 1 | TRUE |
| GSM308322 | GSE12276 | 2.25 | 1 | TRUE |
| GSM308323 | GSE12276 | 1.50 | 1 | TRUE |
| GSM308324 | GSE12276 | 1.17 | 1 | TRUE |
| GSM308325 | GSE12276 | 1.08 | 1 | TRUE |
| GSM308326 | GSE12276 | 1.58 | 1 | TRUE |
| GSM308327 | GSE12276 | 6.08 | 0 | TRUE |
| GSM308328 | GSE12276 | 1.33 | 1 | TRUE |
| GSM308329 | GSE12276 | 0.08 | 0 | TRUE |
| GSM308330 | GSE12276 | 0.00 | 1 | TRUE |
| GSM308331 | GSE12276 | 0.00 | 1 | TRUE |
| GSM308332 | GSE12276 | 3.17 | 1 | TRUE |
| GSM308333 | GSE12276 | 1.50 | 1 | TRUE |
| GSM308334 | GSE12276 | 1.92 | 0 | TRUE |
| GSM308335 | GSE12276 | 4.17 | 1 | TRUE |
| GSM308336 | GSE12276 | 0.67 | 1 | TRUE |
| GSM308337 | GSE12276 | 3.25 | 0 | TRUE |
| GSM308338 | GSE12276 | 0.83 | 1 | TRUE |
| GSM308339 | GSE12276 | 0.25 | 1 | TRUE |
| GSM308340 | GSE12276 | 5.00 | 1 | TRUE |

|           |          |      |   |      |
|-----------|----------|------|---|------|
| GSM308341 | GSE12276 | 1.42 | 0 | TRUE |
| GSM308342 | GSE12276 | 1.92 | 1 | TRUE |
| GSM308343 | GSE12276 | 1.00 | 1 | TRUE |
| GSM308344 | GSE12276 | 0.50 | 1 | TRUE |
| GSM308345 | GSE12276 | 2.50 | 1 | TRUE |
| GSM308346 | GSE12276 | 1.08 | 1 | TRUE |
| GSM308347 | GSE12276 | 0.50 | 1 | TRUE |
| GSM308348 | GSE12276 | 2.08 | 1 | TRUE |
| GSM308349 | GSE12276 | 0.33 | 1 | TRUE |
| GSM308350 | GSE12276 | 1.25 | 1 | TRUE |
| GSM308351 | GSE12276 | 2.50 | 0 | TRUE |
| GSM308352 | GSE12276 | 0.00 | 1 | TRUE |
| GSM308353 | GSE12276 | 5.33 | 0 | TRUE |
| GSM308354 | GSE12276 | 1.75 | 1 | TRUE |
| GSM308355 | GSE12276 | 0.00 | 1 | TRUE |
| GSM308356 | GSE12276 | 1.50 | 1 | TRUE |
| GSM308357 | GSE12276 | 1.33 | 0 | TRUE |
| GSM308358 | GSE12276 | 0.00 | 1 | TRUE |
| GSM308359 | GSE12276 | 3.00 | 1 | TRUE |
| GSM308360 | GSE12276 | 3.25 | 1 | TRUE |
| GSM308361 | GSE12276 | 2.25 | 1 | TRUE |
| GSM308362 | GSE12276 | 1.25 | 1 | TRUE |
| GSM308363 | GSE12276 | 1.83 | 1 | TRUE |
| GSM308364 | GSE12276 | 2.42 | 1 | TRUE |
| GSM308365 | GSE12276 | 0.92 | 1 | TRUE |
| GSM308366 | GSE12276 | 4.83 | 1 | TRUE |
| GSM308367 | GSE12276 | 3.33 | 1 | TRUE |
| GSM308368 | GSE12276 | 4.00 | 1 | TRUE |
| GSM308369 | GSE12276 | 3.17 | 1 | TRUE |
| GSM308370 | GSE12276 | 1.00 | 1 | TRUE |
| GSM308371 | GSE12276 | 1.08 | 1 | TRUE |
| GSM308372 | GSE12276 | 7.08 | 1 | TRUE |
| GSM308373 | GSE12276 | 0.75 | 1 | TRUE |
| GSM308374 | GSE12276 | 0.50 | 1 | TRUE |
| GSM308375 | GSE12276 | 2.33 | 1 | TRUE |
| GSM308376 | GSE12276 | 0.50 | 1 | TRUE |
| GSM308377 | GSE12276 | 1.58 | 1 | TRUE |
| GSM308378 | GSE12276 | 1.25 | 1 | TRUE |
| GSM308380 | GSE12276 | 0.58 | 0 | TRUE |
| GSM308381 | GSE12276 | 9.58 | 1 | TRUE |
| GSM308382 | GSE12276 | 3.83 | 1 | TRUE |
| GSM308383 | GSE12276 | 0.75 | 1 | TRUE |
| GSM308384 | GSE12276 | 2.67 | 1 | TRUE |
| GSM308385 | GSE12276 | 2.25 | 1 | TRUE |
| GSM308386 | GSE12276 | 0.42 | 1 | TRUE |
| GSM308387 | GSE12276 | 0.33 | 1 | TRUE |
| GSM308388 | GSE12276 | 1.42 | 0 | TRUE |

|           |          |      |   |      |
|-----------|----------|------|---|------|
| GSM308389 | GSE12276 | 1.25 | 1 | TRUE |
| GSM308391 | GSE12276 | 0.58 | 1 | TRUE |
| GSM308393 | GSE12276 | 2.75 | 1 | TRUE |
| GSM308394 | GSE12276 | 1.83 | 1 | TRUE |
| GSM308398 | GSE12276 | 1.00 | 1 | TRUE |
| GSM308399 | GSE12276 | 3.17 | 1 | TRUE |
| GSM308401 | GSE12276 | 1.08 | 1 | TRUE |
| GSM308404 | GSE12276 | 0.67 | 1 | TRUE |
| GSM308406 | GSE12276 | 4.83 | 0 | TRUE |
| GSM308407 | GSE12276 | 7.83 | 1 | TRUE |
| GSM308408 | GSE12276 | 0.33 | 1 | TRUE |
| GSM308409 | GSE12276 | 0.00 | 0 | TRUE |
| GSM308410 | GSE12276 | 3.17 | 1 | TRUE |
| GSM308413 | GSE12276 | 4.08 | 1 | TRUE |
| GSM308414 | GSE12276 | 8.08 | 1 | TRUE |
| GSM308415 | GSE12276 | 4.17 | 1 | TRUE |
| GSM308416 | GSE12276 | 4.42 | 1 | TRUE |
| GSM308417 | GSE12276 | 1.92 | 1 | TRUE |
| GSM308418 | GSE12276 | 2.08 | 1 | TRUE |
| GSM308419 | GSE12276 | 1.83 | 1 | TRUE |
| GSM308420 | GSE12276 | 3.00 | 1 | TRUE |
| GSM308421 | GSE12276 | 2.92 | 1 | TRUE |
| GSM308422 | GSE12276 | 1.33 | 1 | TRUE |
| GSM308423 | GSE12276 | 2.92 | 1 | TRUE |
| GSM308424 | GSE12276 | 1.92 | 1 | TRUE |
| GSM308425 | GSE12276 | 1.17 | 1 | TRUE |
| GSM308426 | GSE12276 | 0.75 | 1 | TRUE |
| GSM308427 | GSE12276 | 3.50 | 1 | TRUE |
| GSM308428 | GSE12276 | 1.42 | 1 | TRUE |
| GSM308429 | GSE12276 | 0.42 | 1 | TRUE |
| GSM308430 | GSE12276 | 4.58 | 1 | TRUE |
| GSM308431 | GSE12276 | 1.92 | 1 | TRUE |
| GSM308432 | GSE12276 | 3.33 | 1 | TRUE |
| GSM308433 | GSE12276 | 3.67 | 1 | TRUE |
| GSM308434 | GSE12276 | 3.92 | 1 | TRUE |
| GSM308435 | GSE12276 | 2.17 | 1 | TRUE |
| GSM308436 | GSE12276 | 1.75 | 1 | TRUE |
| GSM308437 | GSE12276 | 2.92 | 1 | TRUE |
| GSM308438 | GSE12276 | 2.92 | 1 | TRUE |
| GSM308439 | GSE12276 | 0.33 | 1 | TRUE |
| GSM308440 | GSE12276 | 0.42 | 1 | TRUE |
| GSM308441 | GSE12276 | 3.50 | 1 | TRUE |
| GSM308442 | GSE12276 | 1.50 | 1 | TRUE |
| GSM308443 | GSE12276 | 1.17 | 1 | TRUE |
| GSM308444 | GSE12276 | 1.33 | 1 | TRUE |
| GSM308445 | GSE12276 | 2.50 | 1 | TRUE |
| GSM308446 | GSE12276 | 3.50 | 1 | TRUE |

|           |          |      |   |       |
|-----------|----------|------|---|-------|
| GSM308447 | GSE12276 | 2.00 | 1 | TRUE  |
| GSM308448 | GSE12276 | 2.08 | 1 | TRUE  |
| GSM308449 | GSE12276 | 3.92 | 1 | TRUE  |
| GSM308450 | GSE12276 | 2.75 | 1 | TRUE  |
| GSM308451 | GSE12276 | 2.42 | 1 | TRUE  |
| GSM308452 | GSE12276 | 2.08 | 1 | TRUE  |
| GSM308453 | GSE12276 | 6.92 | 1 | TRUE  |
| GSM308454 | GSE12276 | 6.08 | 1 | TRUE  |
| GSM308455 | GSE12276 | 2.58 | 1 | TRUE  |
| GSM308456 | GSE12276 | 2.33 | 1 | TRUE  |
| GSM308457 | GSE12276 | 1.50 | 1 | TRUE  |
| GSM308458 | GSE12276 | 0.75 | 1 | TRUE  |
| GSM308459 | GSE12276 | 0.58 | 1 | TRUE  |
| GSM308460 | GSE12276 | 8.92 | 1 | TRUE  |
| GSM491175 | GSE19615 | 2.00 | 1 | TRUE  |
| GSM491176 | GSE19615 | 3.17 | 0 | TRUE  |
| GSM491177 | GSE19615 | 5.00 | 0 | TRUE  |
| GSM491178 | GSE19615 | 0.75 | 1 | TRUE  |
| GSM491179 | GSE19615 | 5.17 | 0 | TRUE  |
| GSM491180 | GSE19615 | 1.33 | 1 | TRUE  |
| GSM491181 | GSE19615 | 5.33 | 0 | FALSE |
| GSM491182 | GSE19615 | 5.58 | 0 | TRUE  |
| GSM491183 | GSE19615 | 2.25 | 1 | TRUE  |
| GSM491184 | GSE19615 | 5.17 | 0 | TRUE  |
| GSM491185 | GSE19615 | 4.33 | 0 | TRUE  |
| GSM491186 | GSE19615 | 0.08 | 1 | TRUE  |
| GSM491187 | GSE19615 | 4.42 | 0 | TRUE  |
| GSM491188 | GSE19615 | 4.50 | 0 | TRUE  |
| GSM491189 | GSE19615 | 4.25 | 0 | TRUE  |
| GSM491190 | GSE19615 | 4.00 | 0 | TRUE  |
| GSM491191 | GSE19615 | 4.33 | 0 | TRUE  |
| GSM491192 | GSE19615 | 4.17 | 0 | TRUE  |
| GSM491193 | GSE19615 | 4.17 | 0 | TRUE  |
| GSM491194 | GSE19615 | 3.33 | 0 | TRUE  |
| GSM491195 | GSE19615 | 4.08 | 0 | TRUE  |
| GSM491196 | GSE19615 | 4.42 | 0 | TRUE  |
| GSM491197 | GSE19615 | 4.17 | 0 | TRUE  |
| GSM491198 | GSE19615 | 2.92 | 1 | TRUE  |
| GSM491199 | GSE19615 | 4.17 | 0 | TRUE  |
| GSM491200 | GSE19615 | 3.00 | 0 | TRUE  |
| GSM491201 | GSE19615 | 3.00 | 0 | TRUE  |
| GSM491202 | GSE19615 | 3.25 | 0 | TRUE  |
| GSM491203 | GSE19615 | 5.42 | 0 | TRUE  |
| GSM491204 | GSE19615 | 6.67 | 0 | FALSE |
| GSM491205 | GSE19615 | 6.50 | 0 | TRUE  |
| GSM491206 | GSE19615 | 6.50 | 0 | TRUE  |
| GSM491207 | GSE19615 | 4.25 | 0 | TRUE  |

|           |          |      |   |       |
|-----------|----------|------|---|-------|
| GSM491208 | GSE19615 | 0.50 | 1 | TRUE  |
| GSM491209 | GSE19615 | 7.08 | 0 | TRUE  |
| GSM491210 | GSE19615 | 6.08 | 0 | TRUE  |
| GSM491211 | GSE19615 | 6.83 | 0 | TRUE  |
| GSM491212 | GSE19615 | 6.25 | 0 | TRUE  |
| GSM491213 | GSE19615 | 6.58 | 0 | FALSE |
| GSM491214 | GSE19615 | 4.33 | 0 | TRUE  |
| GSM491215 | GSE19615 | 6.75 | 0 | TRUE  |
| GSM491216 | GSE19615 | 4.92 | 0 | TRUE  |
| GSM491217 | GSE19615 | 6.92 | 0 | TRUE  |
| GSM491218 | GSE19615 | 7.08 | 0 | TRUE  |
| GSM491219 | GSE19615 | 1.50 | 1 | TRUE  |
| GSM491220 | GSE19615 | 5.83 | 0 | FALSE |
| GSM491221 | GSE19615 | 6.92 | 0 | TRUE  |
| GSM491222 | GSE19615 | 6.17 | 0 | TRUE  |
| GSM491223 | GSE19615 | 7.25 | 0 | TRUE  |
| GSM491224 | GSE19615 | 7.17 | 0 | TRUE  |
| GSM491225 | GSE19615 | 7.17 | 0 | TRUE  |
| GSM491226 | GSE19615 | 6.67 | 0 | FALSE |
| GSM491227 | GSE19615 | 6.50 | 0 | TRUE  |
| GSM491228 | GSE19615 | 6.08 | 0 | TRUE  |
| GSM491229 | GSE19615 | 4.67 | 0 | TRUE  |
| GSM491230 | GSE19615 | 5.83 | 0 | TRUE  |
| GSM491231 | GSE19615 | 6.92 | 0 | TRUE  |
| GSM491232 | GSE19615 | 1.17 | 1 | TRUE  |
| GSM491233 | GSE19615 | 6.25 | 0 | TRUE  |
| GSM491234 | GSE19615 | 6.42 | 0 | FALSE |
| GSM491235 | GSE19615 | 6.08 | 0 | TRUE  |
| GSM491236 | GSE19615 | 4.92 | 0 | TRUE  |
| GSM491237 | GSE19615 | 7.08 | 0 | TRUE  |
| GSM491238 | GSE19615 | 6.42 | 0 | TRUE  |
| GSM491239 | GSE19615 | 6.75 | 0 | TRUE  |
| GSM491240 | GSE19615 | 6.75 | 0 | FALSE |
| GSM491241 | GSE19615 | 4.75 | 0 | TRUE  |
| GSM491242 | GSE19615 | 4.00 | 0 | FALSE |
| GSM491243 | GSE19615 | 4.83 | 0 | FALSE |
| GSM491244 | GSE19615 | 1.75 | 1 | FALSE |
| GSM491245 | GSE19615 | 6.42 | 0 | TRUE  |
| GSM491246 | GSE19615 | 6.83 | 0 | TRUE  |
| GSM491247 | GSE19615 | 5.92 | 0 | TRUE  |
| GSM491248 | GSE19615 | 4.58 | 0 | TRUE  |
| GSM491249 | GSE19615 | 0.17 | 1 | TRUE  |
| GSM491250 | GSE19615 | 6.33 | 0 | TRUE  |
| GSM491251 | GSE19615 | 7.33 | 0 | TRUE  |
| GSM491252 | GSE19615 | 3.92 | 0 | TRUE  |
| GSM491253 | GSE19615 | 6.92 | 0 | FALSE |
| GSM491254 | GSE19615 | 4.50 | 0 | TRUE  |

|           |          |       |   |       |
|-----------|----------|-------|---|-------|
| GSM491255 | GSE19615 | 6.58  | 0 | TRUE  |
| GSM491256 | GSE19615 | 1.25  | 1 | TRUE  |
| GSM491257 | GSE19615 | 1.50  | 1 | TRUE  |
| GSM491258 | GSE19615 | 6.33  | 0 | FALSE |
| GSM491259 | GSE19615 | 6.75  | 0 | FALSE |
| GSM491260 | GSE19615 | 6.92  | 0 | FALSE |
| GSM491261 | GSE19615 | 4.50  | 0 | TRUE  |
| GSM491262 | GSE19615 | 6.58  | 0 | TRUE  |
| GSM491263 | GSE19615 | 6.17  | 0 | TRUE  |
| GSM491264 | GSE19615 | 6.17  | 0 | TRUE  |
| GSM491265 | GSE19615 | 6.75  | 0 | FALSE |
| GSM491266 | GSE19615 | 6.75  | 0 | TRUE  |
| GSM491267 | GSE19615 | 6.33  | 0 | TRUE  |
| GSM491268 | GSE19615 | 5.42  | 0 | TRUE  |
| GSM491269 | GSE19615 | 6.92  | 0 | TRUE  |
| GSM491270 | GSE19615 | 4.00  | 0 | TRUE  |
| GSM491271 | GSE19615 | 4.25  | 0 | TRUE  |
| GSM491272 | GSE19615 | 4.67  | 0 | TRUE  |
| GSM491273 | GSE19615 | 4.92  | 0 | TRUE  |
| GSM491274 | GSE19615 | 5.75  | 0 | TRUE  |
| GSM491275 | GSE19615 | 5.92  | 0 | TRUE  |
| GSM491276 | GSE19615 | 4.42  | 0 | TRUE  |
| GSM491277 | GSE19615 | 4.42  | 0 | TRUE  |
| GSM491278 | GSE19615 | 4.42  | 0 | TRUE  |
| GSM491279 | GSE19615 | 4.50  | 0 | TRUE  |
| GSM491280 | GSE19615 | 5.92  | 0 | FALSE |
| GSM491281 | GSE19615 | 4.00  | 0 | FALSE |
| GSM491282 | GSE19615 | 5.92  | 0 | FALSE |
| GSM491283 | GSE19615 | 5.92  | 0 | TRUE  |
| GSM491284 | GSE19615 | 6.17  | 0 | TRUE  |
| GSM491285 | GSE19615 | 3.00  | 0 | FALSE |
| GSM491286 | GSE19615 | 1.50  | 1 | FALSE |
| GSM491287 | GSE19615 | 6.08  | 0 | TRUE  |
| GSM491288 | GSE19615 | 5.58  | 0 | TRUE  |
| GSM491289 | GSE19615 | 4.58  | 0 | TRUE  |
| GSM50072  | GSE2063  | 10.74 | 0 | TRUE  |
| GSM50073  | GSE2063  | 7.25  | 0 | TRUE  |
| GSM50094  | GSE2063  | 3.22  | 1 | TRUE  |
| GSM50074  | GSE2063  | 7.32  | 0 | FALSE |
| GSM50075  | GSE2063  | 7.32  | 0 | TRUE  |
| GSM50095  | GSE2063  | 6.54  | 1 | FALSE |
| GSM50096  | GSE2063  | 1.38  | 1 | FALSE |
| GSM50107  | GSE2063  | 6.21  | 0 | FALSE |
| GSM50034  | GSE2063  | 7.25  | 0 | TRUE  |
| GSM50097  | GSE2063  | 5.39  | 1 | FALSE |
| GSM50078  | GSE2063  | 6.98  | 0 | TRUE  |
| GSM50098  | GSE2063  | 2.57  | 1 | TRUE  |

|          |         |       |   |       |
|----------|---------|-------|---|-------|
| GSM50035 | GSE2063 | 1.84  | 1 | TRUE  |
| GSM50079 | GSE2063 | 6.52  | 0 | FALSE |
| GSM50108 | GSE2063 | 3.96  | 0 | FALSE |
| GSM50110 | GSE2063 | 5.19  | 0 | TRUE  |
| GSM50111 | GSE2063 | 7.30  | 0 | FALSE |
| GSM50112 | GSE2063 | 1.18  | 1 | FALSE |
| GSM50114 | GSE2063 | 1.30  | 1 | FALSE |
| GSM50115 | GSE2063 | 4.42  | 0 | FALSE |
| GSM50116 | GSE2063 | 3.58  | 0 | FALSE |
| GSM50118 | GSE2063 | 6.28  | 0 | TRUE  |
| GSM50119 | GSE2063 | 4.18  | 0 | TRUE  |
| GSM50120 | GSE2063 | 3.68  | 0 | TRUE  |
| GSM50121 | GSE2063 | 4.12  | 0 | TRUE  |
| GSM50122 | GSE2063 | 3.24  | 1 | TRUE  |
| GSM50123 | GSE2063 | 3.90  | 0 | TRUE  |
| GSM50127 | GSE2063 | 5.24  | 0 | TRUE  |
| GSM50059 | GSE2063 | 7.63  | 0 | FALSE |
| GSM50060 | GSE2063 | 3.47  | 1 | TRUE  |
| GSM50061 | GSE2063 | 3.96  | 1 | FALSE |
| GSM50062 | GSE2063 | 3.07  | 1 | TRUE  |
| GSM50063 | GSE2063 | 3.11  | 1 | FALSE |
| GSM50064 | GSE2063 | 0.94  | 1 | FALSE |
| GSM50065 | GSE2063 | 5.81  | 0 | TRUE  |
| GSM50066 | GSE2063 | 1.24  | 1 | FALSE |
| GSM50128 | GSE2063 | 2.30  | 0 | TRUE  |
| GSM50067 | GSE2063 | 0.77  | 1 | TRUE  |
| GSM50068 | GSE2063 | 3.48  | 1 | TRUE  |
| GSM50036 | GSE2063 | 9.15  | 0 | TRUE  |
| GSM50037 | GSE2063 | 6.86  | 0 | FALSE |
| GSM50038 | GSE2063 | 6.47  | 0 | FALSE |
| GSM50039 | GSE2063 | 7.08  | 0 | TRUE  |
| GSM50040 | GSE2063 | 7.57  | 0 | FALSE |
| GSM50042 | GSE2063 | 4.41  | 0 | FALSE |
| GSM50043 | GSE2063 | 5.23  | 0 | TRUE  |
| GSM50044 | GSE2063 | 5.62  | 0 | TRUE  |
| GSM50045 | GSE2063 | 10.75 | 0 | TRUE  |
| GSM50046 | GSE2063 | 8.04  | 0 | TRUE  |
| GSM50047 | GSE2063 | 5.41  | 0 | FALSE |
| GSM50048 | GSE2063 | 6.07  | 0 | TRUE  |
| GSM50130 | GSE2063 | 3.36  | 0 | TRUE  |
| GSM50049 | GSE2063 | 5.50  | 0 | TRUE  |
| GSM50069 | GSE2063 | 3.83  | 1 | TRUE  |
| GSM50051 | GSE2063 | 3.77  | 0 | FALSE |
| GSM50052 | GSE2063 | 4.56  | 0 | FALSE |
| GSM50053 | GSE2063 | 3.97  | 0 | TRUE  |
| GSM50054 | GSE2063 | 4.05  | 0 | FALSE |
| GSM50080 | GSE2063 | 7.25  | 0 | TRUE  |



|          |         |      |   |       |
|----------|---------|------|---|-------|
| GSM50081 | GSE2063 | 5.07 | 0 | TRUE  |
| GSM50106 | GSE2063 | 1.58 | 1 | TRUE  |
| GSM50082 | GSE2063 | 7.11 | 0 | FALSE |
| GSM50099 | GSE2063 | 1.30 | 1 | TRUE  |
| GSM50083 | GSE2063 | 7.28 | 0 | TRUE  |
| GSM50084 | GSE2063 | 6.40 | 0 | TRUE  |
| GSM50085 | GSE2063 | 6.50 | 0 | FALSE |
| GSM50086 | GSE2063 | 8.31 | 0 | FALSE |
| GSM50087 | GSE2063 | 8.31 | 0 | FALSE |
| GSM50100 | GSE2063 | 5.81 | 1 | FALSE |
| GSM50089 | GSE2063 | 8.74 | 0 | FALSE |
| GSM50131 | GSE2063 | 4.59 | 1 | TRUE  |
| GSM50090 | GSE2063 | 6.79 | 0 | FALSE |
| GSM50091 | GSE2063 | 7.19 | 0 | TRUE  |
| GSM50101 | GSE2063 | 6.36 | 1 | TRUE  |
| GSM50092 | GSE2063 | 6.45 | 0 | TRUE  |
| GSM50102 | GSE2063 | 0.67 | 1 | FALSE |
| GSM50103 | GSE2063 | 1.84 | 1 | TRUE  |
| GSM50104 | GSE2063 | 6.77 | 1 | FALSE |
| GSM50093 | GSE2063 | 7.86 | 0 | FALSE |
| GSM50070 | GSE2063 | 3.36 | 1 | TRUE  |
| GSM50105 | GSE2063 | 7.19 | 0 | TRUE  |

---
